# Supplementary material for: Diagnosis of adenylosuccinate lyase deficiency by metabolomic profiling in plasma reveals a phenotypic spectrum
Source: PubMed Central journal article supplement — Mol Genet Metab Rep. 2016 Jul 27;8:61–6. doi: 10.1016/j.ymgmr.2016.07.007 (PMC4969260; doi:10.1016/j.ymgmr.2016.07.007), 2016-07-27
Supplement: mmc1.pdf [file mmc1.pdf]

**Figure S1. Family pedigrees segregating ADSL deficiency.** Three families, described in the main text, are shown.

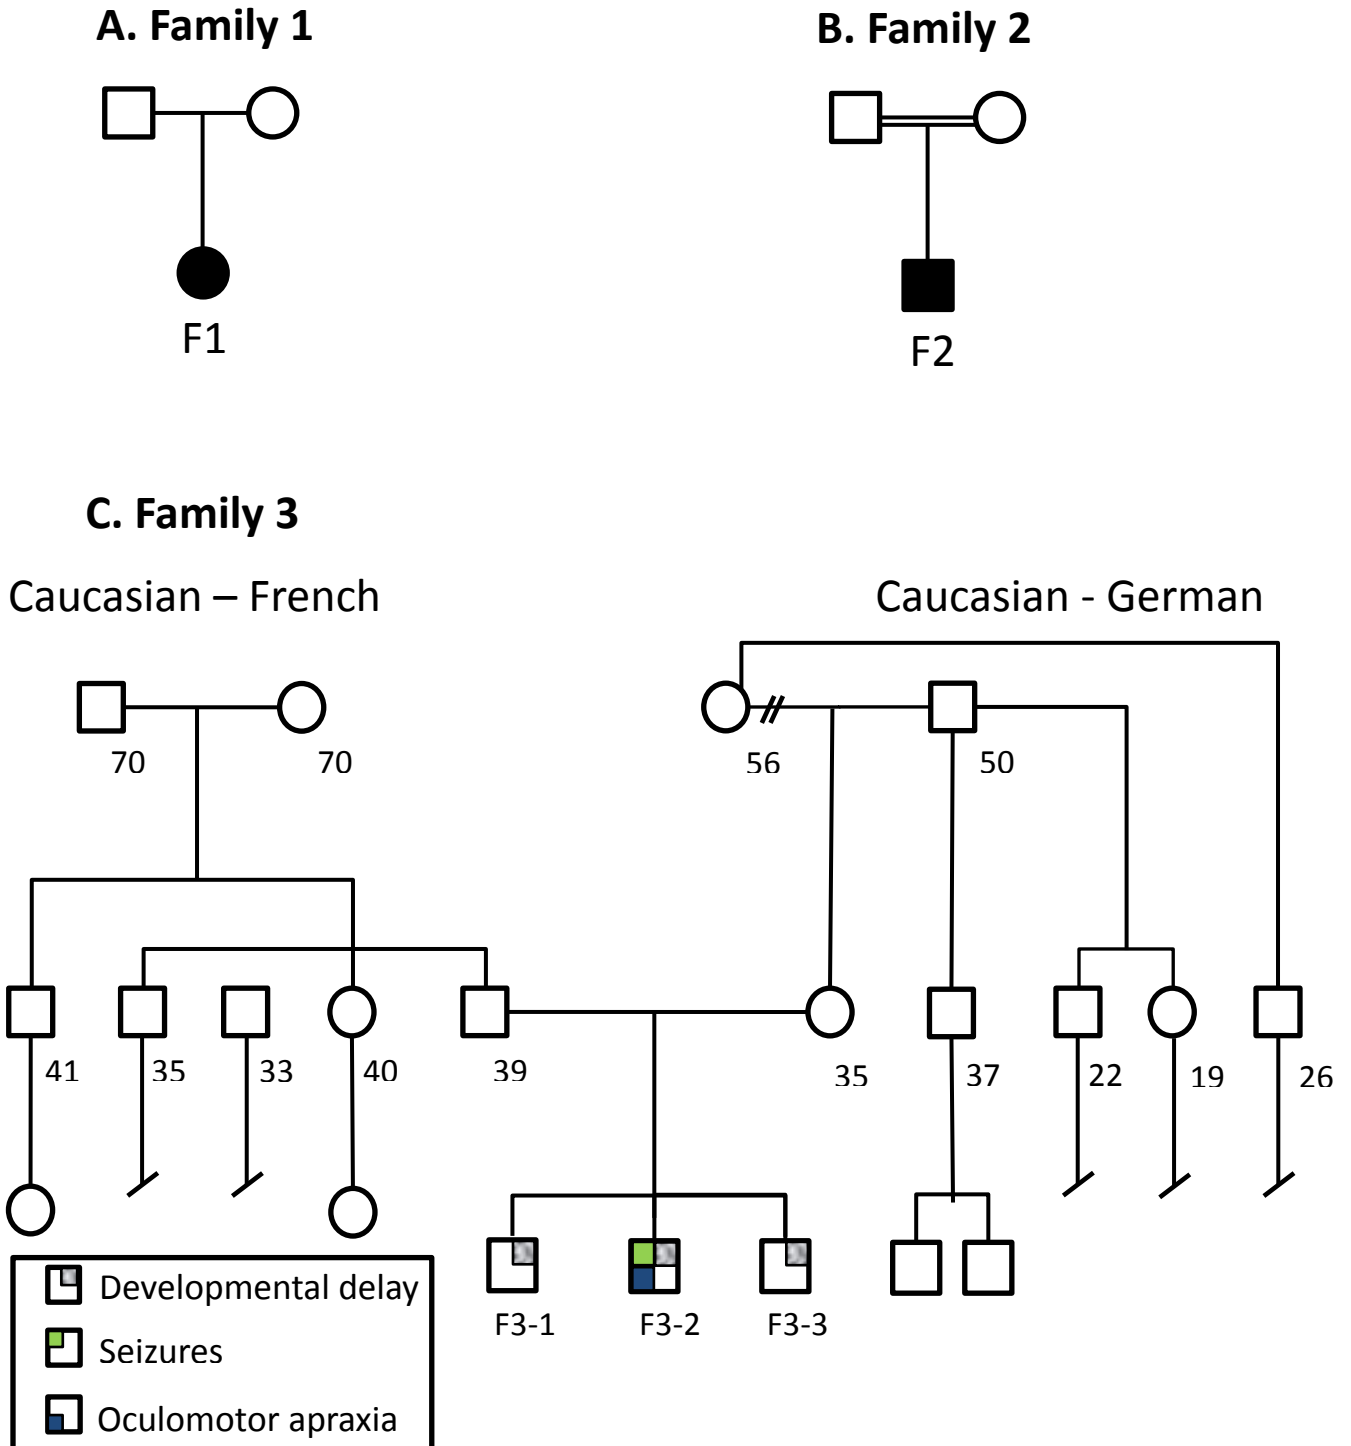

**Table S1. Metabolomic profiling.** Analytes with significant Z scores are shown. Patients F1, F2 and F3-2 have metabolomic profiling of plasma. Metabolomic profiling of urine of patient F1 and CSF of patient F2 are also provided.

| F1 (Plasma)              |         | F1 (urine)                    |         |
|--------------------------|---------|-------------------------------|---------|
| Biochemical              | z score | Biochemical                   | z score |
| N6-succinyladenosine     | 7.66    | N6-succinyladenosine          | 8.43    |
| threitol                 | 2.13    | mandelate                     | 3.25    |
| N-acetylaspartate (NAA)  | 2.05    | fucose                        | 3.10    |
| 1-stearoyl-GPC (18:0)    | -2.00   | hydroquinone sulfate          | 2.94    |
| 3-methyl-2-oxobutyrate   | -2.09   | xylose                        | 2.67    |
| 4-methyl-2-oxopentanoate | -2.09   | adenosine                     | 2.61    |
| indolebutyrate           | -2.18   | 2-oxo-1-pyrrolidinepropionate | 2.43    |
| 2-linoleoyl-GPE* (18:2)* | -2.18   | fucitol                       | 2.29    |
| 1-linoleoyl-GPE (18:2)*  | -2.22   | 4-allylphenol sulfate         | 2.21    |
| 1-arachidoyl-GPC (20:0)  | -2.22   | benzoate                      | 2.17    |
| 1-oleoyl-GPI (18:1)*     | -2.27   | quininate                     | 2.17    |
| cysteine                 | -2.49   |                               |         |
| indole-3-carboxylic acid | -2.50   |                               |         |
| docosatrienoate (22:3n3) | -2.53   |                               |         |
| alpha-ketobutyrate       | -2.72   |                               |         |
| propionylglycine (C3)    | -2.98   |                               |         |

| F2 (Plasma)                             |         | F2 (CSF)                             |         |
|-----------------------------------------|---------|--------------------------------------|---------|
| Biochemical                             | z score | Biochemical                          | z score |
| N6-succinyladenosine                    | 9.46    | N6-succinyladenosine                 | 11.07   |
| 2-pyrrolidinone                         | 7.44    | adenosine                            | 4.89    |
| 4-guanidinobutanoate                    | 4.86    | guanosine                            | 3.78    |
| erucate (22:1n9)                        | 3.69    | 3-hydroxy-3-methylglutarate          | 3.27    |
| arachidate (20:0)                       | 2.71    | N-acetylglutamine                    | 2.78    |
| C-glycosyltryptophan                    | 2.64    | myo-inositol                         | 2.65    |
| 2-oleoylglycerol (18:1)                 | 2.63    | cytidine                             | 2.57    |
| glycohyocholate                         | 2.59    | 3-methylglutaconate                  | 2.45    |
| 1-oleoylglycerol (18:1)                 | 2.39    | galactitol (dulcitol)                | 2.28    |
| N-carbamoylalanine                      | 2.37    | isovalerate (C5)                     | 2.27    |
| 1,5-anhydroglucitol (1,5-AG)            | 2.36    | $\beta$ -hydroxyisovaleroylcarnitine | 2.25    |
| 3-hydroxy-3-methylglutarate             | 2.35    | N-acetylvaline                       | 2.25    |
| galactonate                             | 2.29    | argininosuccinate                    | 2.24    |
| hyocholate                              | 2.27    | orotidine                            | 2.23    |
| betaine                                 | 2.22    | gulonic acid*                        | 2.21    |
| 2,3-diphosphoglycerate                  | 2.20    | 2-methylbutyroylcarnitine (C5)       | 2.20    |
| methionine                              | -2.02   | glucose                              | 2.20    |
| dehydroisoandrosterone sulfate (DHEA-S) | -2.03   | phenyllactate (PLA)                  | 2.16    |
| tyrosine                                | -2.11   | N-acetyl-beta-alanine                | 2.09    |
| 3-(4-hydroxyphenyl)lactate (HPLA)       | -2.13   | malonylcarnitine                     | 2.07    |
| valine                                  | -2.16   | C-glycosyltryptophan                 | 2.04    |
| 2-aminobutyrate                         | -2.19   | citramalate                          | -2.09   |
| gamma-CEHC                              | -2.23   | N-acetylglycine                      | -2.12   |
| homoarginine                            | -2.23   | 1-oleoylglycerol (18:1)              | -2.33   |
| isobutyrylcarnitine (C4)                | -2.26   | N1-methyl-2-pyridone-5-carboxamide   | -2.48   |
| citrulline                              | -2.41   | isocitrate                           | -2.86   |
| isovalerylcarnitine (C5)                | -2.72   | 1-palmitoylglycerol (16:0)           | -3.87   |
| p-cresol sulfate                        | -2.77   |                                      |         |
| urea                                    | -2.77   |                                      |         |
| phenylalanine                           | -3.56   |                                      |         |

| <b>F3-2 (Plasma)</b>                   |                |
|----------------------------------------|----------------|
| <b>Biochemical</b>                     | <b>z score</b> |
| <b>N6-succinyladenosine</b>            | <b>7.29</b>    |
| 2-palmitoyl-GPE* (16:0)*               | 3.14           |
| phenylacetyl glycine                   | 2.39           |
| 1-dihomo-linolenoyl-GPE (20:3n3 or 6)* | 2.37           |
| orotate                                | 2.35           |
| dimethylglycine                        | 2.27           |
| isovaleryl glycine                     | 2.03           |
| tyrosine                               | 2.01           |
| butyrylcarnitine (C4)                  | -2.22          |
| 3-methoxytyrosine                      | -3.99          |

**Table S2. Data from ExAc for c.1277G>A, p.Arg426His variant.**

|                                     |             |
|-------------------------------------|-------------|
| Chromosome                          | 22          |
| Position                            | 40760969    |
| RSID                                | rs119450941 |
| Reference                           | G           |
| Alternate                           | A           |
| Consequence                         | p.Arg426His |
| Protein Consequence                 | p.Arg426His |
| Transcript Consequence              | c.1277G>A   |
| Annotation                          | missense    |
| Allele Count                        | 31          |
| Allele Frequency                    | 0.0002553   |
| Allele Count African                | 1           |
| Allele Count East Asian             | 0           |
| Allele Count European (Non-Finnish) | 28          |
| Allele Count Finnish                | 0           |
| Allele Count Latino                 | 1           |
| Allele Count Other                  | 0           |
| Allele Count South Asian            | 1           |

Data accessed <http://exac.broadinstitute.org> on 05052016.

**Table S3. ExAc data for other pathogenic alleles reported in the literature.**

|    | <b>Variant</b>     | <b>Allele Count</b> | <b>Allele Frequency</b> |
|----|--------------------|---------------------|-------------------------|
| 1  | del206-218         | na                  | na                      |
| 2  | t-49c              | na                  | na                      |
| 3  | p.Met1Leu          | na                  | na                      |
| 4  | p.Met1Val          | na                  | na                      |
| 5  | p.Ala2Val          | 12                  | 0.0001812               |
| 6  | p.Ala3Val          | na                  | na                      |
| 7  | p.Ala3Pro          | na                  | na                      |
| 8  | p.Met26Ile         | 2                   | 0.00002106              |
| 9  | p.Ile72Val         | na                  | na                      |
| 10 | p.Glu80Asp         | na                  | na                      |
| 11 | p.Asp87Glu         | na                  | na                      |
| 12 | p.Pro100Ala        | 1                   | 0.000008238             |
| 13 | p.Tyr114His        | 5                   | 0.0000412               |
| 14 | p.Arg141Trp        | 2                   | 0.00001647              |
| 15 | p.Arg190Gln        | 8                   | 0.00006591              |
| 16 | p.Arg190Ter        | 1                   | 0.000008238             |
| 17 | p.Arg194Cys        | na                  | na                      |
| 18 | p.Lys246Glu        | na                  | na                      |
| 19 | p.Asp268Asn        | 3                   | 0.00002471              |
| 20 | p.Arg303Cys        | 5                   | 0.00004119              |
| 21 | p.Leu311Val        | na                  | na                      |
| 22 | p.Pro318Leu        | 3                   | 0.00002472              |
| 23 | p.Arg337X          | na                  | na                      |
| 24 | p.Val364Met        | 1                   | 0.00000824              |
| 25 | p.Arg374Trp        | 2                   | 0.00001674              |
| 26 | p.Ser395Arg        | na                  | na                      |
| 27 | p.Arg396cys        | na                  | na                      |
| 28 | p.Arg396His        | 6                   | 0.00005192              |
| 29 | p.Asp422Tyr        | 2                   | 0.00001647              |
| 30 | p.Leu423Val        | na                  | na                      |
| 31 | <b>p.Arg426His</b> | <b>31</b>           | <b>0.0002553</b>        |
| 32 | p.Asp430Asn        | 2                   | 0.00001647              |
| 33 | p.Ser438Pro        | na                  | na                      |
| 34 | p.Ser447Pro        | 2                   | 0.00001647              |
| 35 | p.Ser448Pro        | 1                   | 0.000008236             |
| 36 | p.Thr450Ser        | 5                   | 0.00004118              |
| 37 | p.Arg452Pro        | na                  | na                      |
| 38 | p.Pro467Arg        | na                  | na                      |

Data accessed <http://exac.broadinstitute.org> on 05052016.

na – not available in ExAc
